# Supplementary material
Source: PubMed Central journal article supplement (PMC5404944)
Supplement: NIHMS852751-supplement-2.pdf [file NIHMS852751-supplement-2.pdf]

Supplemental Table 1. Experimental groups for C1 stimulation.

|              | No laser           | Laser              | Laser | Laser | Laser | Laser | No laser | Laser | Laser |
|--------------|--------------------|--------------------|-------|-------|-------|-------|----------|-------|-------|
|              | N/A                | N/A                | But   | Hex   | Mif   | DMSO  | SPX      | SPX   | sVNX  |
| DBH-cre      | 29* <sup>1,2</sup> | 39* <sup>1,2</sup> | 6     | 6     | 6     | 6     | 6        | 6     | 6     |
| ChR2-mCherry |                    |                    |       |       |       |       |          |       |       |
| DBH-cre      | 0                  | 6                  | 0     | 0     | 0     | 0     | 0        | 0     | 0     |
| mCherry      |                    |                    |       |       |       |       |          |       |       |
| Total mice   | 29                 | 45                 | 6     | 6     | 6     | 6     | 6        | 6     | 6     |

But, Butoxamine; Hex, Hexamethonium; Mif, Mifepristone; DMSO, Vehicle of Mif; SPX, Splenectomy; sVNX, Subdiaphragmatic vagotomy; \*1 including sham operation of sVNX; \*2 Each number includes the mice for corticosterone experiment

Supplemental Table 2. Experimental groups for restraint stress

|                      | No restraint<br>N/A | Restraint<br>N/A | Restraint<br>Clozapine<br>vehicle <sup>1</sup> | Restraint<br>Clozapine <sup>2</sup> |
|----------------------|---------------------|------------------|------------------------------------------------|-------------------------------------|
| DBH-cre<br>No vector | 24* <sup>1</sup>    | 18* <sup>1</sup> | 0                                              | 0                                   |
| DBH-cre<br>DREADD    | 0                   | 0                | 6                                              | 6                                   |
| DBH-cre<br>Caspase   | 6                   | 6                | 0                                              | 0                                   |
| Total mice           | 30                  | 24               | 6                                              | 6                                   |

<sup>1</sup>Saline, <sup>2</sup>Clozapine N-oxide. \*<sup>1</sup> Each number includes the mice for corticosterone experiment
